# Supplementary material for: Computational exploration of panchromatic dye-sensitized solar cells with broad visible to near-infrared absorption: a density functional theory study
Source: Royal Society of Chemistry journal article supplement (doi:10.1039/d4nj00924j), 2024-01-01
Supplement: d4nj00924j1.pdf [file d4nj00924j1.pdf]

# Computational Exploration of Panchromatic Dye-Sensitized Solar Cells with Broad Visible to Near-Infrared Absorption: A Density Functional Theory Study

Giuseppe Consiglio<sup>\*a</sup>, Adam Gorczyński<sup>b</sup>, Guido Spoto<sup>c</sup>, Salvatore Petralia<sup>d</sup> and Giuseppe Forte<sup>\*d</sup>

<sup>a</sup> Department of Chemical Science University of Catania, Via S. Sofia 64, 95125, Italy,

<sup>b</sup> Faculty of Chemistry, Adam Mickiewicz University, Uniwersytetu Poznańskiego 8, 61-614 Poznań, Poland

<sup>c</sup> InfoBiotech S.r.l, Via del Bersagliere 45, 90143 Palermo, Italy

<sup>d</sup> Department of Drug Science and Health University of Catania, Via S. Sofia 64, 95125, Italy.

Email [gforte@unict.it](mailto:gforte@unict.it)

Email [giuseppe.consiglio@unict.it](mailto:giuseppe.consiglio@unict.it)

Electronic Supplementary Information:

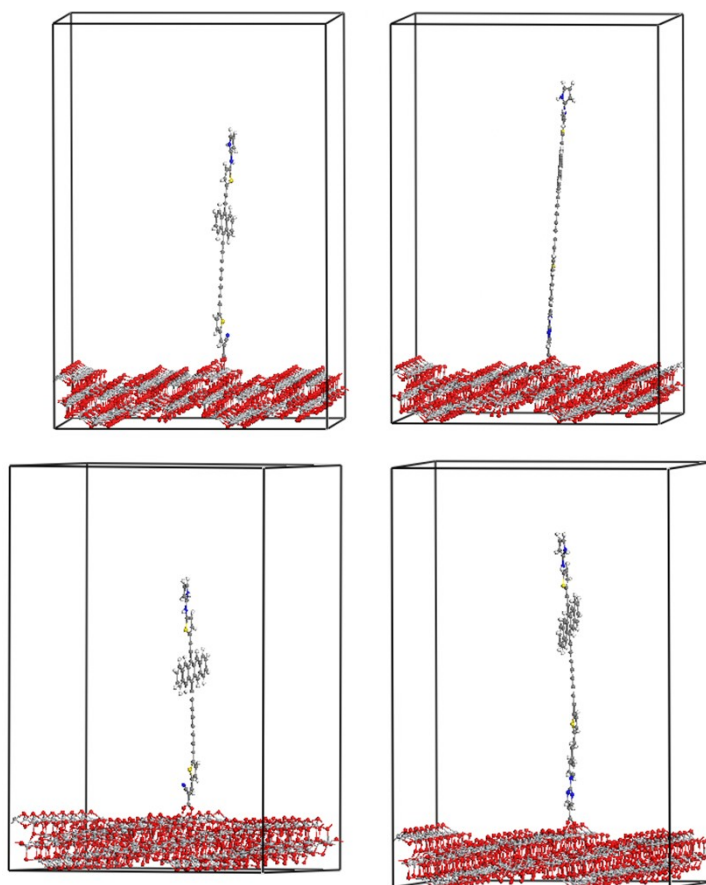

Figure 1: Geometries of bidentate binding mode of investigated dyes on TiO<sub>2</sub>

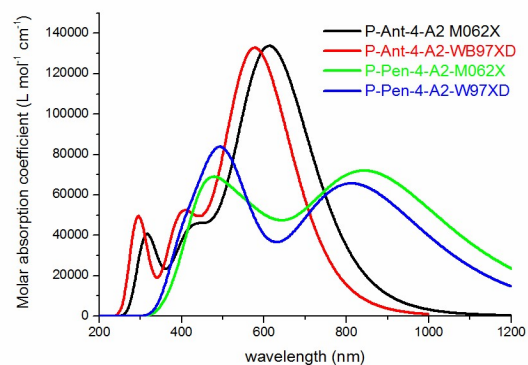

Figure 2: absorption spectra of dyes in acetonitrile at TD-M062X/6-311+G(2d,p)/SMD and level. The spectra are Gaussian broadened with 0.35 eV (half width half maximum).

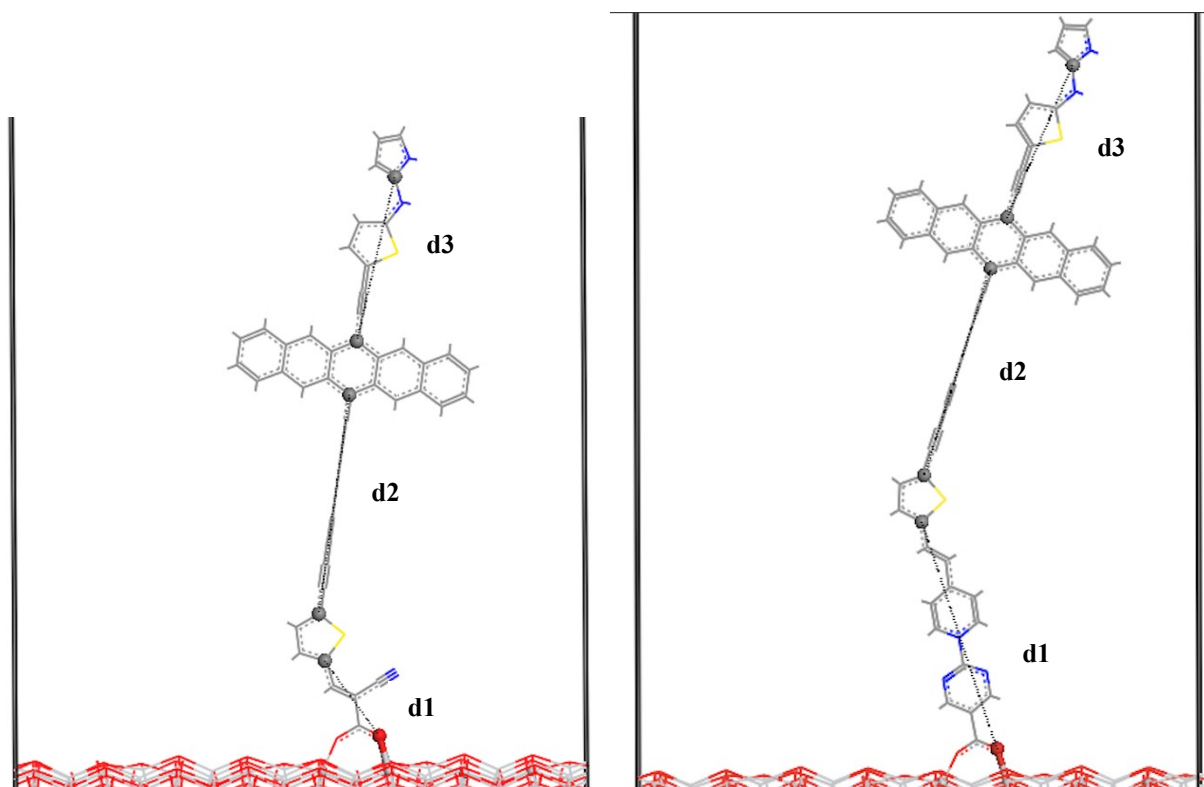

Figure 3: The distances d1, d2, and d3 evaluated during MD simulations are presented above. In brief, d1 represents the distance between the surface and the acceptor (A1 and A2), d2 indicates the distance of the polyynic bridge, and d3 denotes the distance from the acene to the donor.

## Optimized geometries of Dyes

### P-Ant-2-A1

|   |             |             |             |
|---|-------------|-------------|-------------|
| C | 1.76861800  | -0.76654200 | -0.03868100 |
| C | 0.33861500  | -0.69615300 | -0.03655600 |
| C | -0.30899600 | 0.57217500  | -0.04338700 |
| C | 0.46100400  | 1.77082400  | -0.05398700 |
| C | 1.89091500  | 1.70002500  | -0.05640400 |
| C | 2.54053300  | 0.43148100  | -0.04789400 |
| C | 2.63421600  | 2.91305800  | -0.06639200 |
| C | 2.00842600  | 4.12947200  | -0.07443800 |
| C | 0.59505300  | 4.19913000  | -0.07243700 |
| C | -0.15345400 | 3.05365200  | -0.06226900 |
| C | 2.38810000  | -2.04715900 | -0.03107800 |
| C | 1.64489000  | -3.19558000 | -0.02193600 |
| C | 0.23138900  | -3.12552800 | -0.02005200 |
| C | -0.40019000 | -1.91162600 | -0.02725700 |
| H | 3.71525300  | 2.86092500  | -0.06776500 |
| H | -1.23407300 | 3.11561000  | -0.06052900 |
| H | 3.46902500  | -2.10295700 | -0.03281400 |
| H | -1.48181800 | -1.86546500 | -0.02578500 |
| C | -1.71055200 | 0.64646900  | -0.03750400 |
| C | -2.92774800 | 0.72992900  | -0.03069000 |
| C | -4.27079300 | 0.83789400  | -0.02157000 |
| C | -5.48462800 | 0.95398600  | -0.01286700 |
| C | 3.94442700  | 0.36123900  | -0.04810000 |
| C | 5.16071800  | 0.30771800  | -0.04690800 |
| C | 6.54752500  | 0.23245600  | -0.04339800 |
| C | 7.47958400  | 1.25102500  | -0.08639300 |
| S | 7.37805800  | -1.33274200 | 0.01971800  |
| C | 8.81806800  | 0.82566300  | -0.07649400 |
| H | 7.18574800  | 2.29158300  | -0.13064500 |
| C | 8.94740600  | -0.55269900 | -0.03376900 |
| H | 9.65911300  | 1.50000100  | -0.11763000 |
| C | 11.38683800 | -0.87736100 | 0.09310300  |
| C | 11.95290100 | 0.23320900  | 0.69016500  |
| C | 13.36305100 | 0.12017300  | 0.51248800  |
| H | 11.42844800 | 1.01594500  | 1.21205000  |
| C | 13.60933200 | -1.04451800 | -0.17314300 |
| H | 14.10819700 | 0.81896100  | 0.86050100  |
| H | 14.52930800 | -1.50035300 | -0.49984900 |
| N | 10.07079600 | -1.32420400 | -0.02639100 |
| H | 9.95228200  | -2.32659900 | -0.09791100 |
| H | 12.26667100 | -2.50325800 | -0.94026500 |
| N | 12.39742400 | -1.63973500 | -0.43186300 |
| C | -6.86942500 | 1.08969500  | -0.00269600 |
| C | -7.60973300 | 2.26633500  | -0.00516800 |
| S | -7.91138600 | -0.31478700 | 0.01526500  |
| C | -8.98485800 | 2.04149100  | 0.00710800  |
| H | -7.14594800 | 3.24242400  | -0.01557300 |

|   |              |             |             |
|---|--------------|-------------|-------------|
| C | -9.34597900  | 0.69712100  | 0.01909700  |
| H | -9.72792900  | 2.82842300  | 0.00751300  |
| C | -10.69424400 | 0.26280600  | 0.03257600  |
| H | -11.40622700 | 1.08059400  | 0.03394700  |
| C | -11.23718900 | -0.99309600 | 0.04360100  |
| H | 2.59281400   | 5.04176500  | -0.08237300 |
| H | 0.10451400   | 5.16536600  | -0.07903000 |
| H | 2.13636900   | -4.16112500 | -0.01613300 |
| H | -0.35191300  | -4.03875500 | -0.01285700 |
| C | -10.45090600 | -2.17686600 | 0.04131800  |
| N | -9.80124700  | -3.13152200 | 0.03846800  |
| C | -12.69536100 | -1.22006800 | 0.05811100  |
| O | -13.20669900 | -2.32064400 | 0.06812700  |
| O | -13.41611100 | -0.08218600 | 0.05922600  |
| H | -14.35823300 | -0.33072300 | 0.06850300  |

#### P-Ant-4-A1

|   |             |             |             |
|---|-------------|-------------|-------------|
| C | 3.80906400  | -0.84949100 | -0.08649700 |
| C | 2.37954300  | -0.77822600 | -0.08635300 |
| C | 1.73255900  | 0.49200300  | -0.08829400 |
| C | 2.50359200  | 1.69099900  | -0.09456400 |
| C | 3.93308900  | 1.61859000  | -0.09494600 |
| C | 4.58173000  | 0.34873900  | -0.08870900 |
| C | 4.67765200  | 2.83045400  | -0.10029100 |
| C | 4.05308400  | 4.04769500  | -0.10521600 |
| C | 2.64006500  | 4.11871900  | -0.10472300 |
| C | 1.89020000  | 2.97374200  | -0.09947700 |
| C | 4.42827400  | -2.12997400 | -0.08349600 |
| C | 3.68470400  | -3.27840200 | -0.08086600 |
| C | 2.27163000  | -3.20727100 | -0.08071800 |
| C | 1.64042200  | -1.99284000 | -0.08325100 |
| H | 5.75859400  | 2.77729800  | -0.10067600 |
| H | 0.80953300  | 3.03681100  | -0.09912700 |
| H | 5.50919200  | -2.18589700 | -0.08366900 |
| H | 0.55884600  | -1.94690400 | -0.08322000 |
| C | 0.33373000  | 0.56301500  | -0.08122000 |
| C | -0.88749000 | 0.62787400  | -0.06756000 |
| C | -2.22505800 | 0.70139700  | -0.06345900 |
| C | -3.45049300 | 0.77057000  | -0.04422200 |
| C | 5.98445800  | 0.27828400  | -0.08211100 |
| C | 7.20115600  | 0.22740200  | -0.06996600 |
| C | 8.58702800  | 0.15578500  | -0.05075300 |
| C | 9.51653000  | 1.17863800  | -0.06039500 |
| S | 9.42209300  | -1.40767800 | -0.00365900 |
| C | 10.85524200 | 0.75770300  | -0.03667000 |
| H | 9.21902000  | 2.21863500  | -0.08954400 |
| C | 10.98860100 | -0.62144200 | -0.01707300 |
| H | 11.69548600 | 1.43417500  | -0.05049100 |
| C | 13.42445500 | -0.92995800 | 0.15677400  |
| C | 13.96369600 | 0.15904600  | 0.81423100  |

|   |              |             |             |
|---|--------------|-------------|-------------|
| C | 15.37776400  | 0.07514400  | 0.65449300  |
| H | 13.41803900  | 0.90990000  | 1.36075500  |
| C | 15.65235000  | -1.05302800 | -0.08025300 |
| H | 16.10682100  | 0.76775200  | 1.04615100  |
| H | 16.58436800  | -1.48036200 | -0.41131800 |
| N | 12.11564700  | -1.38632900 | -0.00437100 |
| H | 12.00604900  | -2.38865200 | -0.09166300 |
| H | 14.34379000  | -2.49420500 | -0.93514700 |
| N | 14.45418400  | -1.65314600 | -0.38582000 |
| C | -9.95395300  | 1.16056800  | 0.02455300  |
| C | -10.74333200 | 2.30305800  | 0.03522500  |
| S | -10.93184800 | -0.28891100 | 0.03267100  |
| C | -12.10829600 | 2.01689300  | 0.04957200  |
| H | -10.32297200 | 3.29870100  | 0.03241500  |
| C | -12.40682500 | 0.65822200  | 0.05010600  |
| H | -12.88545800 | 2.77000700  | 0.05946800  |
| C | -13.73692200 | 0.16110800  | 0.06291000  |
| H | -14.48590000 | 0.94506600  | 0.07460500  |
| C | -14.21761500 | -1.11748600 | 0.06232300  |
| C | -4.78442000  | 0.84777100  | -0.03322900 |
| C | -6.00860500  | 0.92150000  | -0.01959200 |
| C | -7.34707300  | 1.00209800  | -0.00494400 |
| C | -8.56481900  | 1.08165600  | 0.00894900  |
| H | 4.63865200   | 4.95919700  | -0.10948600 |
| H | 2.15033000   | 5.08533900  | -0.10861400 |
| H | 4.17576400   | -4.24411500 | -0.07893600 |
| H | 1.68735200   | -4.11986800 | -0.07870200 |
| C | -13.37545500 | -2.26279300 | 0.04686500  |
| N | -12.68214400 | -3.18572300 | 0.03409000  |
| C | -15.66530400 | -1.41495100 | 0.07726300  |
| O | -16.12133800 | -2.53888700 | 0.07574800  |
| O | -16.43709700 | -0.31300200 | 0.09279500  |
| H | -17.36750200 | -0.60280500 | 0.10086400  |

### **P-Ant-2-A2**

|   |              |             |             |
|---|--------------|-------------|-------------|
| C | -8.84344600  | 0.23872300  | 0.08180900  |
| C | -9.91655400  | 1.16096500  | 0.05271600  |
| C | -9.19973600  | -1.12946200 | 0.08782300  |
| C | -11.20872200 | 0.73137200  | 0.02554900  |
| H | -9.74571200  | 2.22766900  | 0.05012500  |
| C | -10.50508900 | -1.52214400 | 0.06108600  |
| H | -8.43361100  | -1.89303900 | 0.11193700  |
| H | -12.04890600 | 1.40594600  | 0.00223000  |
| H | -10.80772700 | -2.55632600 | 0.06311600  |
| N | -11.51324500 | -0.60209000 | 0.02704900  |
| C | -12.88666100 | -1.03240300 | -0.01277200 |
| C | -15.06904300 | -0.47928100 | -0.11814700 |
| C | -14.35768800 | -2.73814500 | -0.04550000 |
| C | -15.41163000 | -1.82936500 | -0.11464800 |
| H | -15.82348400 | 0.29655300  | -0.16232700 |

|   |              |             |             |
|---|--------------|-------------|-------------|
| H | -14.54341100 | -3.80554200 | -0.03258700 |
| N | -13.08977300 | -2.34131800 | 0.00320500  |
| N | -13.80047500 | -0.07772700 | -0.06379600 |
| C | -16.80911800 | -2.32284400 | -0.17775200 |
| O | -17.11410000 | -3.49226500 | -0.12669700 |
| C | 5.14895800   | -0.50474700 | 0.09261700  |
| C | 3.75339200   | -0.18677900 | 0.13707800  |
| C | 3.33205400   | 1.17171500  | 0.06198900  |
| C | 4.29420800   | 2.21517000  | -0.05303300 |
| C | 5.68968700   | 1.89683000  | -0.09816900 |
| C | 6.11279900   | 0.53774500  | -0.02509200 |
| C | 6.62774200   | 2.95999200  | -0.21429800 |
| C | 6.21951400   | 4.26382900  | -0.28122400 |
| C | 4.84040800   | 4.57811900  | -0.23570500 |
| C | 3.90832300   | 3.58241600  | -0.12512000 |
| C | 5.54006500   | -1.87058600 | 0.16652500  |
| C | 4.61269000   | -2.86993300 | 0.27887000  |
| C | 3.23354100   | -2.55533700 | 0.32362700  |
| C | 2.81933700   | -1.25306500 | 0.25475300  |
| H | 7.68296500   | 2.72230700  | -0.24754000 |
| H | 2.85515300   | 3.83054800  | -0.08987200 |
| H | 6.59455500   | -2.11279200 | 0.13156900  |
| H | 1.76262400   | -1.02102000 | 0.28847900  |
| C | 1.96244000   | 1.47959000  | 0.09236300  |
| C | 0.76980800   | 1.73627700  | 0.10979700  |
| C | -0.55068900  | 2.00579800  | 0.11951000  |
| C | -1.74604700  | 2.24824000  | 0.12213600  |
| C | 7.48395500   | 0.22964300  | -0.06433100 |
| C | 8.67662300   | -0.01322000 | -0.09138600 |
| C | 10.03858600  | -0.28466500 | -0.11717900 |
| C | 11.09832600  | 0.59399400  | -0.23382300 |
| S | 10.65175100  | -1.94357700 | 0.01216200  |
| C | 12.36661500  | -0.00864800 | -0.22961700 |
| H | 10.94544900  | 1.66129800  | -0.32600800 |
| C | 12.30935100  | -1.38760100 | -0.11645000 |
| H | 13.29112800  | 0.53993100  | -0.32239900 |
| C | 14.68430100  | -2.02072000 | 0.00788100  |
| C | 15.38945700  | -0.99744600 | 0.61139300  |
| C | 16.77225400  | -1.27548300 | 0.40477400  |
| H | 14.96988000  | -0.16535800 | 1.15208200  |
| C | 16.86446800  | -2.44994500 | -0.30269600 |
| H | 17.60240200  | -0.67775900 | 0.74864100  |
| H | 17.71750100  | -3.00797400 | -0.65181700 |
| N | 13.32062300  | -2.30072400 | -0.08990400 |
| H | 13.07129100  | -3.28109600 | -0.11101200 |
| H | 15.34166900  | -3.71904500 | -1.07175700 |
| N | 15.58581200  | -2.89084600 | -0.54672500 |
| C | -3.11524000  | 2.49377500  | 0.11720400  |
| C | -3.77266800  | 3.71642400  | 0.10005200  |
| S | -4.26301400  | 1.16872300  | 0.12495800  |
| C | -5.16497300  | 3.59089400  | 0.09219600  |

|   |              |             |             |
|---|--------------|-------------|-------------|
| H | -3.24106900  | 4.65763200  | 0.09274300  |
| C | -5.61777100  | 2.27857900  | 0.10332000  |
| H | -5.84833000  | 4.43007200  | 0.07815400  |
| C | -6.98345800  | 1.87841700  | 0.09299500  |
| H | -7.68012400  | 2.71081000  | 0.07416400  |
| C | -7.45719400  | 0.60333300  | 0.10157200  |
| H | -6.76174900  | -0.23009700 | 0.12076200  |
| H | 6.95080900   | 5.05854000  | -0.36834200 |
| H | 4.52292000   | 5.61289300  | -0.28814200 |
| H | 4.93142300   | -3.90402300 | 0.33329000  |
| H | 2.50322400   | -3.35104800 | 0.41235000  |
| O | -17.70491800 | -1.32991300 | -0.30029800 |
| H | -18.59617200 | -1.72519600 | -0.33077200 |

**P-Ant-4-A2**

|   |              |             |             |
|---|--------------|-------------|-------------|
| C | -11.61202000 | 0.15994700  | -0.03432800 |
| C | -12.69654900 | 1.06694500  | -0.02181400 |
| C | -11.94613300 | -1.21234200 | -0.03734200 |
| C | -13.98332500 | 0.61802600  | -0.00859600 |
| H | -12.54073100 | 2.13600400  | -0.02034300 |
| C | -13.24676900 | -1.62440300 | -0.02393000 |
| H | -11.16827700 | -1.96418200 | -0.04975800 |
| H | -14.83414800 | 1.27930600  | 0.00332700  |
| H | -13.53465200 | -2.66286200 | -0.02524400 |
| N | -14.26634600 | -0.71871100 | -0.00766500 |
| C | -15.63545300 | -1.16828500 | 0.01396600  |
| C | -17.82639400 | -0.64191400 | 0.01722100  |
| C | -17.08379800 | -2.89083400 | 0.07822900  |
| C | -18.15110000 | -1.99562500 | 0.06232600  |
| H | -18.59168700 | 0.12425200  | 0.00001500  |
| H | -17.25470800 | -3.96026900 | 0.11196300  |
| N | -15.81991200 | -2.47828000 | 0.05391500  |
| N | -16.56174600 | -0.22515800 | -0.00696000 |
| C | -19.54415000 | -2.50519100 | 0.09737300  |
| O | -19.83200800 | -3.67861600 | 0.15274700  |
| C | 7.58599100   | -0.77741000 | -0.03233100 |
| C | 6.17103500   | -0.56161500 | -0.03575100 |
| C | 5.65604700   | 0.76735000  | -0.02190000 |
| C | 6.54422400   | 1.88188200  | -0.00357900 |
| C | 7.95914000   | 1.66497700  | -0.00033800 |
| C | 8.47581800   | 0.33625600  | -0.01519400 |
| C | 8.82247900   | 2.79520600  | 0.01792100  |
| C | 8.32442800   | 4.06932000  | 0.03226800  |
| C | 6.92587000   | 4.28319900  | 0.02912200  |
| C | 6.06399200   | 3.22018000  | 0.01170700  |
| C | 8.07210900   | -2.11405400 | -0.04658300 |
| C | 7.21609600   | -3.18112700 | -0.06316000 |
| C | 5.81750600   | -2.96715500 | -0.06652000 |
| C | 5.31272400   | -1.69512100 | -0.05326300 |
| H | 9.89250500   | 2.63308200  | 0.02057300  |

|   |              |             |             |
|---|--------------|-------------|-------------|
| H | 4.99539100   | 3.39307600  | 0.00957500  |
| H | 9.14167200   | -2.27978100 | -0.04410600 |
| H | 4.24138400   | -1.53986100 | -0.05600100 |
| C | 4.27083200   | 0.97776600  | -0.02644500 |
| C | 3.06153000   | 1.15941800  | -0.03495900 |
| C | 1.73620000   | 1.35683600  | -0.03082900 |
| C | 0.52203400   | 1.53699500  | -0.04079100 |
| C | 9.86449500   | 0.12413200  | -0.01351500 |
| C | 11.06965900  | -0.05049500 | -0.01375300 |
| C | 12.44110600  | -0.26454300 | -0.01457200 |
| C | 13.47092400  | 0.65702700  | -0.02652400 |
| S | 13.11093200  | -1.90625300 | -0.00754500 |
| C | 14.75950400  | 0.10012100  | -0.03836900 |
| H | 13.28169100  | 1.72246900  | -0.03415400 |
| C | 14.74932000  | -1.28529600 | -0.04551600 |
| H | 15.66455900  | 0.68687700  | -0.06109600 |
| C | 17.14102900  | -1.85987000 | 0.07672100  |
| C | 17.80608700  | -0.84940800 | 0.74441900  |
| C | 19.20001300  | -1.08844600 | 0.56482900  |
| H | 17.35425600  | -0.05224300 | 1.31070900  |
| C | 19.33822300  | -2.22726500 | -0.19141600 |
| H | 20.00649900  | -0.48873700 | 0.95795000  |
| H | 20.21271400  | -2.75045000 | -0.54134500 |
| N | 15.78828800  | -2.16546100 | -0.07356900 |
| H | 15.56776900  | -3.14645500 | -0.18829100 |
| H | 17.86686500  | -3.49731000 | -1.05320300 |
| N | 18.07677000  | -2.68438900 | -0.49073100 |
| C | -5.91943000  | 2.51691100  | -0.03903600 |
| C | -6.60006100  | 3.72579700  | -0.03154100 |
| S | -7.03935000  | 1.16819800  | -0.04520700 |
| C | -7.99012100  | 3.57171500  | -0.03033400 |
| H | -6.08708500  | 4.67724600  | -0.02680300 |
| C | -8.41364900  | 2.25067300  | -0.03708700 |
| H | -8.68999400  | 4.39714100  | -0.02448200 |
| C | -9.77527600  | 1.82538200  | -0.03538100 |
| H | -10.48458600 | 2.64696200  | -0.02691800 |
| C | -10.22777900 | 0.54533400  | -0.04169500 |
| H | -9.52128300  | -0.27879500 | -0.05035700 |
| C | -0.79992200  | 1.73348000  | -0.03975100 |
| C | -2.01287000  | 1.91624300  | -0.04129700 |
| C | -3.33875200  | 2.11698900  | -0.04101000 |
| C | -4.54468100  | 2.30780100  | -0.04063100 |
| H | 8.99923200   | 4.91684300  | 0.04607900  |
| H | 6.53669300   | 5.29445800  | 0.04068700  |
| H | 7.60673000   | -4.19160900 | -0.07376600 |
| H | 5.14386700   | -3.81590000 | -0.07960100 |
| O | -20.45636400 | -1.52061200 | 0.06263500  |
| H | -21.34347500 | -1.92561100 | 0.08850100  |

**P-Pen-2-A1**



|   |             |             |             |
|---|-------------|-------------|-------------|
| C | 1.57370200  | -0.83762500 | -0.07456700 |
| C | 0.13294000  | -0.72777800 | -0.06614500 |
| C | -0.48169900 | 0.56455100  | -0.06006300 |
| C | 0.32249200  | 1.74830100  | -0.06640400 |
| C | 1.76314900  | 1.63712200  | -0.07468300 |
| C | 2.37939100  | 0.34508500  | -0.07586400 |
| C | 2.53537100  | 2.80933400  | -0.08022700 |
| C | 1.96028800  | 4.07430700  | -0.07822400 |
| C | 0.52247100  | 4.18688500  | -0.06963400 |
| C | -0.24942000 | 3.02963100  | -0.06394400 |
| C | -0.06109800 | 5.49218200  | -0.06745900 |
| C | 0.72585800  | 6.60631700  | -0.07334600 |
| C | 2.14887600  | 6.49442000  | -0.08194500 |
| C | 2.74640300  | 5.26871400  | -0.08432500 |
| C | 2.15807400  | -2.11403000 | -0.08010700 |
| C | 1.39649300  | -3.27635100 | -0.07785800 |
| C | -0.04177800 | -3.16805500 | -0.06896400 |
| C | -0.62795800 | -1.90655300 | -0.06330900 |
| C | -0.81801000 | -4.36877800 | -0.06648200 |
| C | -0.21059500 | -5.59007100 | -0.07237600 |
| C | 1.21282000  | -5.69692800 | -0.08127900 |
| C | 1.99073200  | -4.57699000 | -0.08392000 |
| H | 3.61519600  | 2.72877700  | -0.08669100 |
| H | -1.32817200 | 3.12655400  | -0.05765400 |
| H | -1.14205200 | 5.57749900  | -0.06098700 |
| H | 0.27336900  | 7.59118700  | -0.07157300 |
| H | 2.75112500  | 7.39530900  | -0.08648100 |
| H | 3.82693500  | 5.17788600  | -0.09079700 |
| H | 3.23767500  | -2.19976100 | -0.08668100 |
| H | -1.70888800 | -1.83713200 | -0.05690700 |
| H | -1.89928000 | -4.28774200 | -0.05976700 |
| H | -0.80845700 | -6.49409100 | -0.07038600 |
| H | 1.67016500  | -6.67935200 | -0.08583200 |
| H | 3.07247600  | -4.65250600 | -0.09058000 |
| C | -1.87308700 | 0.67213200  | -0.04618400 |
| C | -3.09218800 | 0.77140900  | -0.03194300 |
| C | -4.43142900 | 0.88407100  | -0.01456400 |
| C | -5.64778900 | 0.99630400  | 0.00196000  |
| C | 3.77336700  | 0.23948000  | -0.07488300 |
| C | 4.99051600  | 0.16088000  | -0.06639000 |
| C | 6.37088900  | 0.06341000  | -0.05030400 |
| C | 7.31851100  | 1.07356200  | -0.05565100 |
| S | 7.18168700  | -1.51382600 | -0.01281800 |
| C | 8.64734100  | 0.63255600  | -0.03538400 |
| H | 7.03647200  | 2.11791700  | -0.07957500 |
| C | 8.75932500  | -0.75089700 | -0.02294500 |
| H | 9.49868600  | 1.29504400  | -0.04701200 |
| C | 11.18917300 | -1.08986600 | 0.15234200  |
| C | 11.74054700 | -0.01754800 | 0.82693300  |
| C | 13.15283900 | -0.11449300 | 0.66484800  |
| H | 11.20302500 | 0.73029100  | 1.38560600  |

|   |              |             |             |
|---|--------------|-------------|-------------|
| C | 13.41435300  | -1.23425500 | -0.08810500 |
| H | 13.88988200  | 0.56335900  | 1.06711400  |
| H | 14.34149900  | -1.66632200 | -0.42661500 |
| N | 9.87469900   | -1.52854700 | -0.01430700 |
| H | 9.75257300   | -2.52934100 | -0.10575900 |
| H | 12.09022700  | -2.64684700 | -0.96519100 |
| N | 12.21020000  | -1.81633900 | -0.40190000 |
| C | -7.03082700  | 1.11581800  | 0.02117400  |
| C | -7.79034900  | 2.28295100  | 0.03119900  |
| S | -8.05532200  | -0.30355700 | 0.03640100  |
| C | -9.16035600  | 2.03907500  | 0.05057000  |
| H | -7.34056500  | 3.26569000  | 0.02441700  |
| C | -9.50569100  | 0.68862700  | 0.05588200  |
| H | -9.91367600  | 2.81630400  | 0.06089500  |
| C | -10.84478800 | 0.23546100  | 0.07482500  |
| H | -11.56886800 | 1.04249600  | 0.08700900  |
| C | -11.37135700 | -1.03038000 | 0.08008600  |
| C | -10.56921400 | -2.20245100 | 0.06329200  |
| N | -9.90779100  | -3.14931100 | 0.04868500  |
| C | -12.82411500 | -1.27748300 | 0.10256500  |
| O | -13.32242400 | -2.38490900 | 0.10815300  |
| O | -13.56208800 | -0.14967200 | 0.11676900  |
| H | -14.49989000 | -0.41338500 | 0.13022400  |

**P-Pen-4-A1**

|   |             |             |            |
|---|-------------|-------------|------------|
| C | -3.36974100 | -0.93056700 | 0.08221000 |
| C | -1.92786500 | -0.84527800 | 0.08200600 |
| C | -1.29088300 | 0.43823600  | 0.07864100 |
| C | -2.07624700 | 1.63659000  | 0.08083300 |
| C | -3.51803100 | 1.54892200  | 0.08093700 |
| C | -4.15596700 | 0.26642900  | 0.07861100 |
| C | -4.27149900 | 2.73269700  | 0.08206100 |
| C | -3.67609000 | 3.98867900  | 0.08342400 |
| C | -2.23698000 | 4.07770900  | 0.08315700 |
| C | -1.48364800 | 2.90738100  | 0.08178100 |
| C | -1.63238300 | 5.37292300  | 0.08443600 |
| C | -2.40143700 | 6.49985500  | 0.08587600 |
| C | -3.82573300 | 6.41127800  | 0.08620300 |
| C | -4.44302000 | 5.19518900  | 0.08505900 |
| C | -3.97625500 | -2.19606000 | 0.08487800 |
| C | -3.23471200 | -3.37181900 | 0.08748100 |
| C | -1.79522700 | -3.28792300 | 0.08691600 |
| C | -1.18747300 | -2.03588200 | 0.08410700 |
| C | -1.03955000 | -4.50122100 | 0.08947400 |
| C | -1.66786700 | -5.71223000 | 0.09239600 |
| C | -3.09251700 | -5.79501400 | 0.09303200 |
| C | -3.85123200 | -4.66174800 | 0.09068200 |
| H | -5.35250700 | 2.66942000  | 0.08230600 |
| H | -0.40336400 | 2.98691000  | 0.08167100 |
| H | -0.55020100 | 5.44086300  | 0.08420500 |

|   |              |             |             |
|---|--------------|-------------|-------------|
| H | -1.93280100  | 7.47713500  | 0.08678500  |
| H | -4.41337300  | 7.32174600  | 0.08735100  |
| H | -5.52488500  | 5.12168100  | 0.08528600  |
| H | -5.05719300  | -2.26303400 | 0.08524300  |
| H | -0.10543900  | -1.98522100 | 0.08396300  |
| H | 0.04295600   | -4.43864900 | 0.08901300  |
| H | -1.08528500  | -6.62616500 | 0.09425100  |
| H | -3.56663400  | -6.76943200 | 0.09537000  |
| H | -4.93411900  | -4.71876300 | 0.09110100  |
| C | 1.32282600   | 0.59588100  | 0.05682700  |
| C | 2.65607600   | 0.67767300  | 0.05373900  |
| C | 3.88395900   | 0.75346900  | 0.03421500  |
| C | 5.21491100   | 0.83611400  | 0.02415000  |
| C | 6.44083300   | 0.91387100  | 0.01138900  |
| C | 7.77742700   | 0.99790800  | -0.00262200 |
| C | 8.99624100   | 1.08004200  | -0.01602100 |
| C | 0.09846400   | 0.52152300  | 0.07081700  |
| C | -5.54983000  | 0.18341600  | 0.06986400  |
| C | -6.76840700  | 0.12208800  | 0.05493100  |
| C | -8.14828500  | 0.04078600  | 0.03228400  |
| C | -9.08500100  | 1.06246000  | 0.03459300  |
| S | -8.97678400  | -1.52722300 | -0.00926100 |
| C | -10.41749400 | 0.63700000  | 0.00893400  |
| H | -8.79072400  | 2.10335400  | 0.06062800  |
| C | -10.54519800 | -0.74610700 | -0.00476700 |
| H | -11.26157500 | 1.30871300  | 0.01797800  |
| C | -12.97834500 | -1.05632300 | -0.18525500 |
| C | -13.51700200 | 0.02384500  | -0.85756100 |
| C | -14.93030800 | -0.05860300 | -0.69813300 |
| H | -12.97065300 | 0.76722100  | -1.41360100 |
| C | -15.20495400 | -1.17787100 | 0.05107000  |
| H | -15.65947400 | 0.62810300  | -1.09969400 |
| H | -16.13728600 | -1.60082400 | 0.38683500  |
| N | -11.66888700 | -1.50973900 | -0.01788300 |
| H | -11.55889500 | -2.51212900 | 0.07365400  |
| H | -13.89777400 | -2.60729300 | 0.92597900  |
| N | -14.00790500 | -1.77392400 | 0.36484400  |
| C | 10.38378000  | 1.16108400  | -0.03119400 |
| C | 11.17307200  | 2.30519000  | -0.03841200 |
| S | 11.36505700  | -0.28715000 | -0.04375200 |
| C | 12.53752000  | 2.02130800  | -0.05366500 |
| H | 10.75132400  | 3.30023900  | -0.03256300 |
| C | 12.83978700  | 0.66259700  | -0.05837400 |
| H | 13.31337700  | 2.77587300  | -0.06131900 |
| C | 14.16913200  | 0.16846500  | -0.07298900 |
| H | 14.91685700  | 0.95365500  | -0.08272400 |
| C | 14.65357100  | -1.11023500 | -0.07632800 |
| C | 13.81438700  | -2.25728000 | -0.06346500 |
| N | 13.12350200  | -3.18228900 | -0.05272500 |
| C | 16.10084900  | -1.40377900 | -0.09302900 |
| O | 16.56109000  | -2.52644200 | -0.09489800 |

|   |             |             |             |
|---|-------------|-------------|-------------|
| O | 16.87077900 | -0.29972700 | -0.10619300 |
| H | 17.80143300 | -0.58842300 | -0.11561300 |

**P-Pen-2-A2**

|   |             |             |             |
|---|-------------|-------------|-------------|
| C | 9.40851800  | 0.26269000  | -0.00706300 |
| C | 10.47180300 | 1.19592000  | 0.06780500  |
| C | 9.78238300  | -1.10210600 | -0.02889900 |
| C | 11.76718100 | 0.78070800  | 0.11463700  |
| H | 10.28908000 | 2.26046600  | 0.08937500  |
| C | 11.09039800 | -1.48048800 | 0.01838400  |
| H | 9.02590300  | -1.87360700 | -0.08473900 |
| H | 12.59838500 | 1.46426700  | 0.17101500  |
| H | 11.40439800 | -2.51102200 | 0.00227600  |
| N | 12.08874700 | -0.54990900 | 0.09070000  |
| C | 13.46389500 | -0.96501900 | 0.14094300  |
| C | 15.64005300 | -0.38914200 | 0.26755900  |
| C | 14.95374900 | -2.65508600 | 0.18119600  |
| C | 15.99744500 | -1.73547200 | 0.26342300  |
| H | 16.38576200 | 0.39456500  | 0.32105400  |
| H | 15.15137500 | -3.72035800 | 0.16625200  |
| N | 13.68225700 | -2.27229700 | 0.12246700  |
| N | 14.36816900 | -0.00083900 | 0.20254300  |
| C | 17.39888500 | -2.21442600 | 0.33878700  |
| O | 17.71642700 | -3.38093000 | 0.29432800  |
| C | -4.56990400 | -0.65033100 | -0.23728700 |
| C | -3.16668000 | -0.31248500 | -0.30698800 |
| C | -2.76155800 | 1.05906800  | -0.25537800 |
| C | -3.73962400 | 2.09841300  | -0.15477100 |
| C | -5.14268900 | 1.75946200  | -0.08583400 |
| C | -5.54845500 | 0.38731900  | -0.12163200 |
| C | -6.08677300 | 2.79278400  | 0.01974100  |
| C | -5.71709200 | 4.13175800  | 0.05775400  |
| C | -4.31729000 | 4.47162200  | -0.01438400 |
| C | -3.37559100 | 3.45293200  | -0.11741500 |
| C | -3.94621800 | 5.85189400  | 0.02341600  |
| C | -4.89619300 | 6.82530700  | 0.12700200  |
| C | -6.28141600 | 6.48840800  | 0.19902700  |
| C | -6.67866900 | 5.18443100  | 0.16566600  |
| C | -4.94664800 | -2.00183800 | -0.28247300 |
| C | -4.01443700 | -3.02630200 | -0.39579200 |
| C | -2.61369500 | -2.69012500 | -0.46847200 |
| C | -2.23272400 | -1.35318700 | -0.42112300 |
| C | -1.66090500 | -3.74947900 | -0.58698200 |
| C | -2.06841500 | -5.05044500 | -0.62936800 |
| C | -3.45470900 | -5.38297000 | -0.55729500 |
| C | -4.39662500 | -4.40338300 | -0.44414200 |
| H | -7.13896900 | 2.54227600  | 0.07170400  |
| H | -2.32717200 | 3.71993700  | -0.17117900 |
| H | -2.89398400 | 6.10821700  | -0.03119200 |
| H | -4.60413300 | 7.86869600  | 0.15512500  |

|   |              |             |             |
|---|--------------|-------------|-------------|
| H | -7.01602700  | 7.28098600  | 0.28013800  |
| H | -7.72962800  | 4.92281500  | 0.21932500  |
| H | -5.99757600  | -2.25833000 | -0.22914200 |
| H | -1.17793400  | -1.11299700 | -0.47477000 |
| H | -0.60788000  | -3.49659900 | -0.64142800 |
| H | -1.33786800  | -5.84616600 | -0.71842200 |
| H | -3.75206300  | -6.42444300 | -0.59334700 |
| H | -5.45102400  | -4.65087900 | -0.38955100 |
| C | -1.40350400  | 1.38062200  | -0.28354700 |
| C | -0.21062400  | 1.65140000  | -0.28821600 |
| C | 1.10325700   | 1.93503100  | -0.27030900 |
| C | 2.29760600   | 2.19175500  | -0.24270000 |
| C | -6.90601100  | 0.06227300  | -0.04365600 |
| C | -8.09413900  | -0.20369500 | 0.02799900  |
| C | -9.44180800  | -0.50744000 | 0.11264400  |
| C | -10.52424300 | 0.35063300  | 0.21226200  |
| S | -10.01118500 | -2.18724900 | 0.11686000  |
| C | -11.77057700 | -0.28228800 | 0.29719700  |
| H | -10.39819700 | 1.42516300  | 0.22900600  |
| C | -11.67752600 | -1.66706200 | 0.27747400  |
| H | -12.70412800 | 0.24924900  | 0.39372400  |
| C | -14.03444000 | -2.38273900 | 0.34460000  |
| C | -14.81719200 | -1.39162800 | -0.21620900 |
| C | -16.17234700 | -1.73626100 | 0.05915900  |
| H | -14.46814000 | -0.54117200 | -0.77716300 |
| C | -16.17225200 | -2.91638500 | 0.76302200  |
| H | -17.04628900 | -1.17707800 | -0.23759000 |
| H | -16.97859800 | -3.51421400 | 1.15454700  |
| N | -12.65740500 | -2.60538900 | 0.36446600  |
| H | -12.37390100 | -3.57460800 | 0.43727300  |
| H | -14.55520800 | -4.11646800 | 1.44393500  |
| N | -14.86376000 | -3.29857200 | 0.93672800  |
| C | 3.65990900   | 2.45194500  | -0.19501100 |
| C | 4.30430300   | 3.68374200  | -0.14730800 |
| S | 4.82517300   | 1.14022100  | -0.17442100 |
| C | 5.69476000   | 3.57482500  | -0.09373400 |
| H | 3.76134900   | 4.61850000  | -0.15065700 |
| C | 6.16628900   | 2.26706000  | -0.09937800 |
| H | 6.36682900   | 4.42220800  | -0.05120600 |
| C | 7.53248400   | 1.88404000  | -0.04966400 |
| H | 8.21899100   | 2.72356300  | -0.00031200 |
| C | 8.02244300   | 0.61220000  | -0.05908400 |
| H | 7.33585800   | -0.22732900 | -0.10955600 |
| O | 18.28429000  | -1.21229100 | 0.46456200  |
| H | 19.17883400  | -1.59913800 | 0.50355100  |

#### **P-Pen-4-A2**

|   |              |             |             |
|---|--------------|-------------|-------------|
| C | -12.42678500 | 0.19084800  | -0.02740400 |
| C | -13.50774600 | 1.10331600  | -0.01612300 |
| C | -12.76901600 | -1.18027000 | -0.02927600 |

|   |              |             |             |
|---|--------------|-------------|-------------|
| C | -14.79640900 | 0.66127900  | -0.00356300 |
| H | -13.34667700 | 2.17159100  | -0.01534600 |
| C | -14.07126000 | -1.58548800 | -0.01650800 |
| H | -11.99513200 | -1.93624400 | -0.04035200 |
| H | -15.64367300 | 1.32708800  | 0.00712900  |
| H | -14.36440300 | -2.62243700 | -0.01705700 |
| N | -15.08714600 | -0.67447200 | -0.00201000 |
| C | -16.45740700 | -1.11653800 | 0.01819800  |
| C | -18.64608100 | -0.57907800 | 0.02241900  |
| C | -17.91514900 | -2.83185300 | 0.07785400  |
| C | -18.97798600 | -1.93120000 | 0.06425000  |
| H | -19.40744200 | 0.19105300  | 0.00704500  |
| H | -18.09165700 | -3.90048100 | 0.10870700  |
| N | -16.64924300 | -2.42598300 | 0.05463700  |
| N | -17.37946900 | -0.16865400 | -0.00051800 |
| C | -20.37338600 | -2.43369000 | 0.09824900  |
| O | -20.66728900 | -3.60579400 | 0.15165400  |
| C | 6.76195000   | -0.90045200 | -0.02710700 |
| C | 5.33557700   | -0.67318800 | -0.03108000 |
| C | 4.82889100   | 0.66673700  | -0.02750900 |
| C | 5.72870300   | 1.78139200  | -0.01906600 |
| C | 7.15485400   | 1.55179400  | -0.01528400 |
| C | 7.66263600   | 0.21281900  | -0.01961800 |
| C | 8.02133800   | 2.65565400  | -0.00726000 |
| C | 7.55265200   | 3.96423500  | -0.00267200 |
| C | 6.12940500   | 4.19481400  | -0.00621300 |
| C | 5.26453700   | 3.10455700  | -0.01424500 |
| C | 5.65511200   | 5.54327300  | -0.00130800 |
| C | 6.53127100   | 6.58899600  | 0.00661900  |
| C | 7.93995700   | 6.36044200  | 0.01012100  |
| C | 8.43451700   | 5.08954300  | 0.00561200  |
| C | 7.24026000   | -2.21968300 | -0.03093000 |
| C | 6.38654600   | -3.31645800 | -0.03817600 |
| C | 4.96244700   | -3.09097500 | -0.04205800 |
| C | 4.48120900   | -1.78511900 | -0.03846700 |
| C | 4.09114800   | -4.22415600 | -0.04953500 |
| C | 4.59717900   | -5.49109200 | -0.05290600 |
| C | 6.00679800   | -5.71383900 | -0.04904300 |
| C | 6.87328600   | -4.66074600 | -0.04188800 |
| H | 9.09095500   | 2.48655300  | -0.00437800 |
| H | 4.19753000   | 3.29098300  | -0.01674100 |
| H | 4.58481400   | 5.71720800  | -0.00395400 |
| H | 6.16123900   | 7.60768300  | 0.01034200  |
| H | 8.61432900   | 7.20869200  | 0.01639400  |
| H | 9.50388500   | 4.90973500  | 0.00825200  |
| H | 8.30915200   | -2.39356200 | -0.02815000 |
| H | 3.40939600   | -1.62818600 | -0.04149300 |
| H | 3.02007600   | -4.05517900 | -0.05241400 |
| H | 3.92756400   | -6.34335300 | -0.05851300 |
| H | 6.38261300   | -6.73021300 | -0.05180600 |
| H | 7.94534200   | -4.82384900 | -0.03886600 |

|   |              |             |             |
|---|--------------|-------------|-------------|
| C | 3.45385500   | 0.88625400  | -0.03224500 |
| C | 2.24262800   | 1.07898300  | -0.04066600 |
| C | 0.92292700   | 1.28841700  | -0.03495000 |
| C | -0.29206300  | 1.48118400  | -0.04461700 |
| C | 9.04165300   | -0.00855100 | -0.01662200 |
| C | 10.24758200  | -0.19410600 | -0.01500100 |
| C | 11.61174100  | -0.41972400 | -0.01306300 |
| C | 12.65082900  | 0.49714400  | -0.03207900 |
| S | 12.27068300  | -2.06662700 | 0.00835800  |
| C | 13.93150600  | -0.06680000 | -0.03761400 |
| H | 12.46738800  | 1.56337900  | -0.04985700 |
| C | 13.91194600  | -1.45543500 | -0.03246600 |
| H | 14.84134200  | 0.51227000  | -0.06480000 |
| C | 16.30001400  | -2.03553300 | 0.09676000  |
| C | 16.96856000  | -1.02831500 | 0.76586600  |
| C | 18.36063700  | -1.27053400 | 0.58332500  |
| H | 16.51927700  | -0.23189800 | 1.33535300  |
| C | 18.49423000  | -2.40854300 | -0.17596700 |
| H | 19.16955700  | -0.67443600 | 0.97677000  |
| H | 19.36694900  | -2.93289300 | -0.52858200 |
| N | 14.94557800  | -2.33687100 | -0.05083100 |
| H | 14.72191900  | -3.31871700 | -0.15600500 |
| H | 17.01914900  | -3.67297500 | -1.03800900 |
| N | 17.23210600  | -2.86213400 | -0.47352000 |
| C | -6.72243200  | 2.51619300  | -0.03693400 |
| C | -7.39734200  | 3.72964400  | -0.03023300 |
| S | -7.85118000  | 1.17395400  | -0.04093800 |
| C | -8.78735900  | 3.58383700  | -0.02793000 |
| H | -6.87877700  | 4.67806800  | -0.02685800 |
| C | -9.22013200  | 2.26490800  | -0.03298100 |
| H | -9.48228300  | 4.41350600  | -0.02250200 |
| C | -10.58236800 | 1.84776000  | -0.03020100 |
| H | -11.28773300 | 2.67280600  | -0.02245300 |
| C | -11.04233300 | 0.56888900  | -0.03501400 |
| H | -10.33946500 | -0.25837900 | -0.04292700 |
| C | -1.60945700  | 1.69059400  | -0.04214400 |
| C | -2.82245800  | 1.88507000  | -0.04219300 |
| C | -4.14492300  | 2.09765900  | -0.04082600 |
| C | -5.35036100  | 2.29846400  | -0.03947500 |
| O | -21.28092900 | -1.44455600 | 0.06520000  |
| H | -22.16989400 | -1.84544800 | 0.09033000  |
